# Supplementary material
Source: HighWire-hosted journal article supplement (doi:10.1101/rna.080174.124)
Supplement: Supplemental_Material_raw_data.xlsx [file Supplemental_Material_raw_data.xlsx]

## Sheet: Fig. 2a
Data Fig. 2a
	LbuCas13a			LwaCas13a
100	110005	110562		20511	22819
10	95932	102036		9731	9733
0.1	37584	50983		4529	3625
0.05	24244	36433		5267	3718
0.025	23826	26226		6709	3915
bkg RNA	2531	2598		2362	2200

## Sheet: Fig. 2b
Data Fig. 2b
	mvRNA				mvRNA + 100ng HEK293T Total RNA
1000000000	64257	60476	61279		62910	64227	57343
100000000	46386	57741	57626		33254	43067	47763
10000000	20047	23803	23052		10513	13553	19781
1000000	2769	4623	8342		3172	3396	4703
100000	1898	2135	2713		1667	1789	1801
10000	1821	1824	1732		1516	1615	1462
0	1762	1686	1801		1596	1571	1566

## Sheet: Fluorescenc standard curve
Cas13 standard curve Fig. 3
Time (minutes)	1.0 x 109			2.0 x 108			4.0 x 107			8.0 x 107			1.6 x 107			3.2 x 106			2.0 x 105			NTC
0		3652	4568		1452	1364		1132	1190		1056	1173		1085	1205		1063	1155		1066	1126		1172	1168
5		7946	10505		2156	2292		1326	1398		1193	1332		1184	1324		1141	1283		1132	1285		1252	1374
10		15221	20281		3419	3698		1555	1779		1312	1439		1232	1417		1199	1348		1158	1290		1304	1392
15		23099	30411		5026	5595		1878	2194		1343	1542		1312	1467		1281	1400		1172	1315		1373	1421
20		30419	39126		6750	7630		2071	2639		1397	1685		1333	1532		1326	1403		1215	1436		1315	1402
25		36016	45366		8481	9764		2403	3196		1431	1763		1367	1502		1348	1450		1230	1448		1356	1473
30		41250	50681		10266	11969		2691	3685		1539	1914		1417	1548		1319	1423		1261	1366		1416	1459
35		44876	53903		11773	14020		2920	4133		1509	2006		1417	1614		1345	1488		1239	1430		1376	1453
40		47729	56867		13619	16086		3189	4636		1624	2128		1461	1637		1382	1481		1313	1443		1377	1469
45		50116	58708		15511	18137		3528	5322		1691	2244		1479	1718		1413	1480		1274	1474		1429	1460
50		51982	60105		17171	20030		3860	5707		1717	2350		1508	1682		1412	1544		1297	1476		1430	1522
55		53278	61036		18658	21797		4124	6351		1757	2534		1520	1721		1386	1484		1360	1497		1463	1565
60		54537	61927		20262	23709		4551	6964		1825	2678		1560	1777		1396	1555		1325	1505		1442	1504
65		55152	62797		21925	25327		4840	7542		1894	2777		1575	1859		1444	1549		1351	1572		1465	1581
70		55885	62250		23320	27166		5111	8113		1920	2937		1593	1927		1422	1598		1392	1541		1461	1559
75		56386	62566		24968	28815		5475	8675		2027	3069		1636	1973		1489	1591		1373	1572		1501	1573
80		56466	63059		26814	30315		5726	9204		2139	3230		1675	2020		1512	1640		1391	1597		1489	1556
85		57871	63076		28084	31883		6150	9906		2189	3363		1689	2047		1492	1644		1434	1584		1536	1555
90		57239	63038		29614	33093		6393	10454		2276	3420		1734	2118		1540	1651		1424	1616		1527	1583
95		57638	63285		30824	34164		6685	11015		2305	3627		1767	2141		1535	1716		1434	1552		1566	1615
100		57626	62595		32334	35539		7016	11664		2410	3718		1794	2159		1649	1733		1439	1675		1599	1593
105		58102	62659		33490	36733		7259	12210		2442	3848		1756	2272		1601	1686		1479	1678		1598	1584
110		57811	63484		34893	37663		7760	12917		2533	4026		1840	2212		1613	1771		1505	1703		1665	1609
115		57895	63031		36014	38466		8052	13353		2699	4231		1844	2312		1622	1734		1510	1692		1655	1709
120		57586	63163		37314	39623		8417	14091		2708	4385		1895	2395		1665	1847		1543	1719		1682	1633
125		57956	62739		37896	40719		8756	14560		2746	4487		1972	2416		1689	1806		1574	1648		1650	1665
130		57442	63114		38911	41409		9046	15318		2789	4617		1930	2427		1672	1864		1485	1721		1638	1675
135		57860	62994		40155	41977		9371	15761		2934	4856		2006	2543		1762	1855		1596	1755		1719	1638
140		57596	62996		41452	42657		9755	16367		2957	4876		2013	2561		1718	1832		1593	1750		1740	1645
145		57400	62831		41912	43314		10017	16682		3094	5143		2098	2560		1735	1886		1583	1763		1767	1693
150		57809	63028		43114	43651		10464	17539		3117	5297		2061	2649		1743	1899		1638	1802		1780	1764
155		57862	63223		43543	44325		10810	18094		3190	5419		2098	2757		1804	1935		1640	1786		1758	1785
160		58294	63347		44311	44920		11234	18668		3274	5646		2116	2770		1823	1971		1638	1815		1790	1790
165		57939	63188		45520	45452		11457	19305		3374	5784		2173	2808		1792	1966		1599	1821		1768	1795
170		57577	62765		45981	45859		11797	19897		3521	5949		2262	2832		1839	1979		1764	1840		1808	1797
175		57703	63052		46891	46224		12164	20431		3575	6121		2273	2903		1917	2009		1640	1870		1852	1823
180		58028	62802		47364	46598		12495	21012		3604	6340		2306	3073		1871	2020		1663	1876		1856	1817

## Sheet: Cas13 curve
copy numbers	R1	R2	R3
64000	13.8	12.8	13.85
320000	14.7	16.45	12.4
1600000	18.3	17.95	12.7
8000000	30.5	32	32.55
40000000	80.75	110.25	84.9
200000000	294.7	392.75	288.05
1000000000	1175.2	1752.95	1411.2

## Sheet: Fig. 3d
Data Fig. 3d
	Cas13				RT-qPCR				PE
WT	248000000	143000000	226000000		485800000	279650000	304050000		480000000	318800000	320000000
PB1a	91900000	44600000	66600000		26290000	20880000	16980000		24000000	110000000	96000000
